# Supplementary material for: Whole Genome Sequencing of Elite Rice Cultivars as a Comprehensive Information Resource for Marker Assisted Selection
Source: PLoS One. 2015 Apr 29;10(4):e0124617. doi: 10.1371/journal.pone.0124617 (PMC4414565; doi:10.1371/journal.pone.0124617)
Supplement: S3 Table — 100bp bins with characteristic deletions comparing indica, temperate japonica and tropical japonica. (XLS) [file pone.0124617.s012.xls]

## Sheet: Sheet1
		Relative to
		Indica		Tropical japonica		Temperate japonica
		Bins	% in repeats	Bins	% in repeats	Bins	% in repeats
Characteristic	Indica	0	0	107635	0.656822	132034	0.649037
	Tropical Japonica	27499	0.647551	0	0	51338	0.643578
	Temperate japonica	4708	0.6661	1577	0.805961	0	0
